# Supplementary material for: NiFeO<sub>X </sub>as a Bifunctional Electrocatalyst for Oxygen Reduction (OR) and Evolution (OE) Reaction in Alkaline Media
Source: Preprints.org preprint supplement (doi:10.20944/preprints201807.0009.v1), 2018-07-02
Supplement: Supplementary file 1 [file supplementary]

Supplementary figures list:

Figure S1. CV curve of the NiFe sample at 100 °C

Figure S2. RDE curves of 0.125 and 0.25 mg cm<sup>-2</sup> loadings of NiFe samples calcined at different temperature in 0.1 M KOH with 5 mV s<sup>-1</sup> at different rotation rates (400-2500 rpm)

Figure S3. Electrochemical stability of Ni Fe oxide calcined at different temperature with three different mass loadings

Figure S4. Raman spectra of the different samples a) 100-250 °C; b) 450-600 °C

25 Supplementary figures:

26 Figure S1. CV curve of the NiFe sample at 100 °C

27

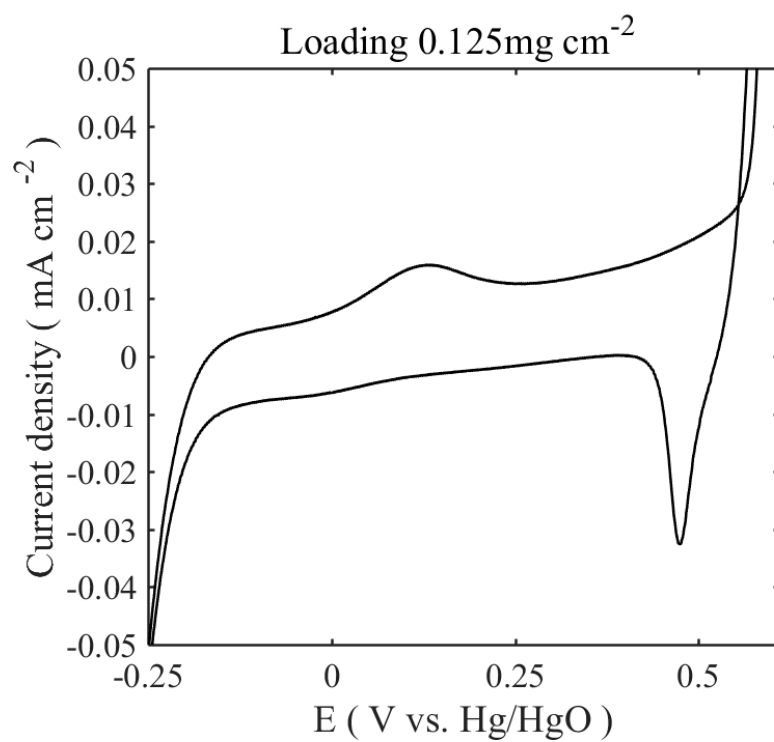

28

29

30

31

32

33

34

35

36

Figure S2. RDE curves of 0.125 and 0.25 mg cm<sup>-2</sup> loadings of NiFe samples calcined at different temperature in 0.1 M KOH with 5 mV s<sup>-1</sup> at different rotation rates (400-2500 rpm)

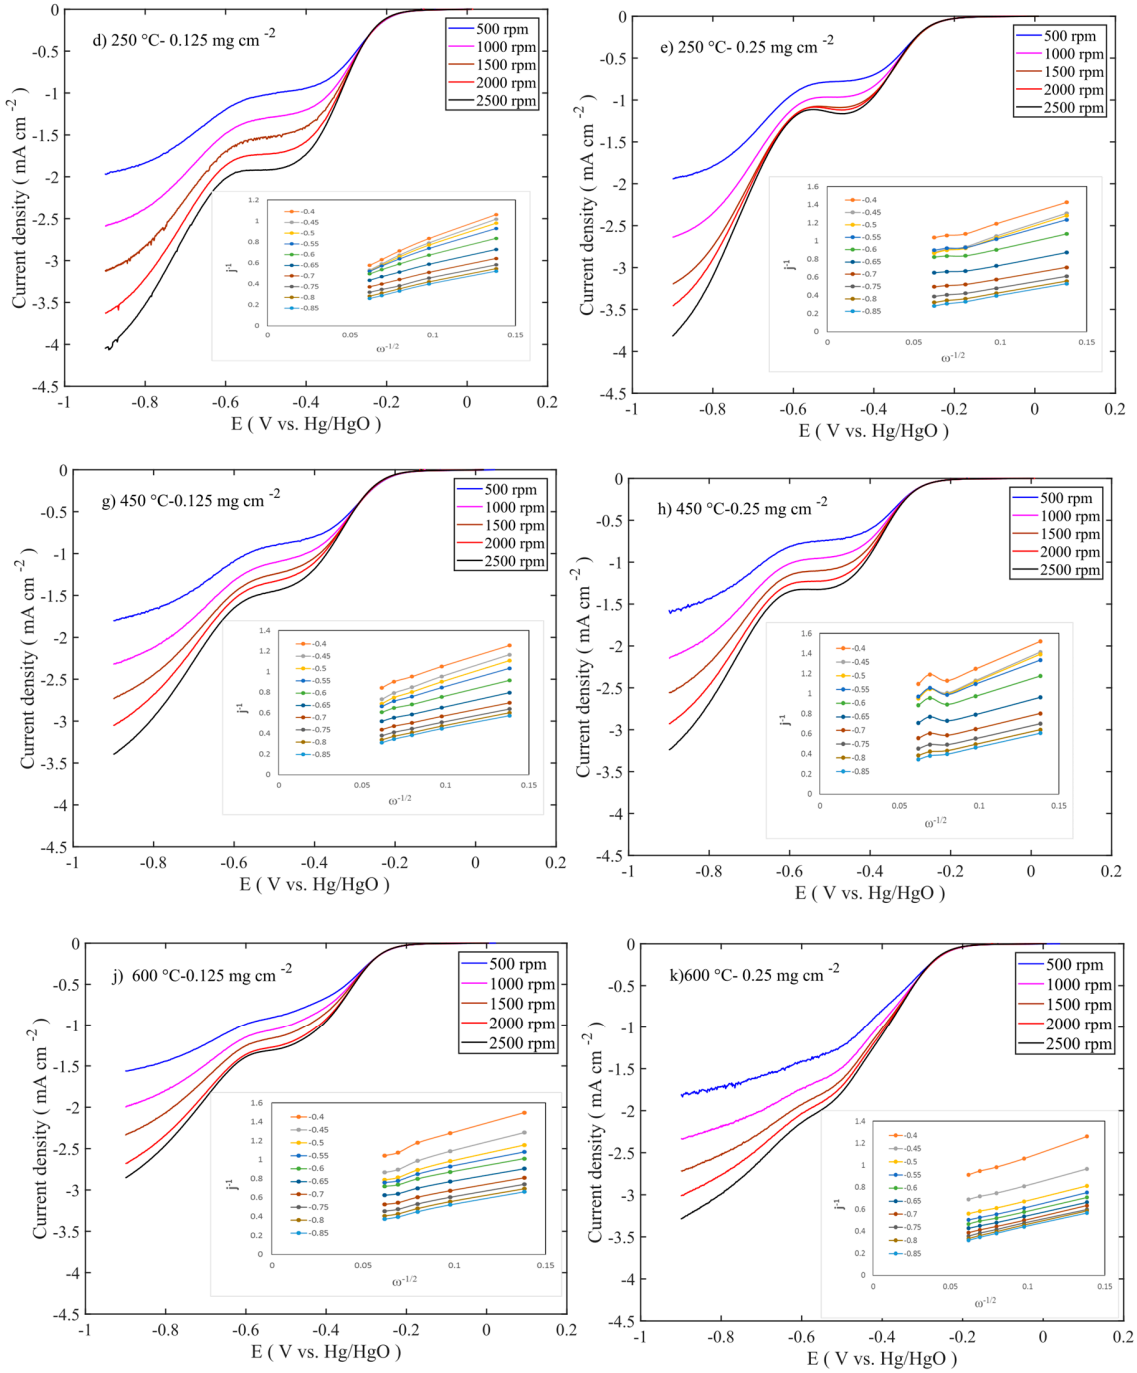

Figure S3. Electrochemical stability of Ni Fe oxide calcined at different temperature with three different mass loadings

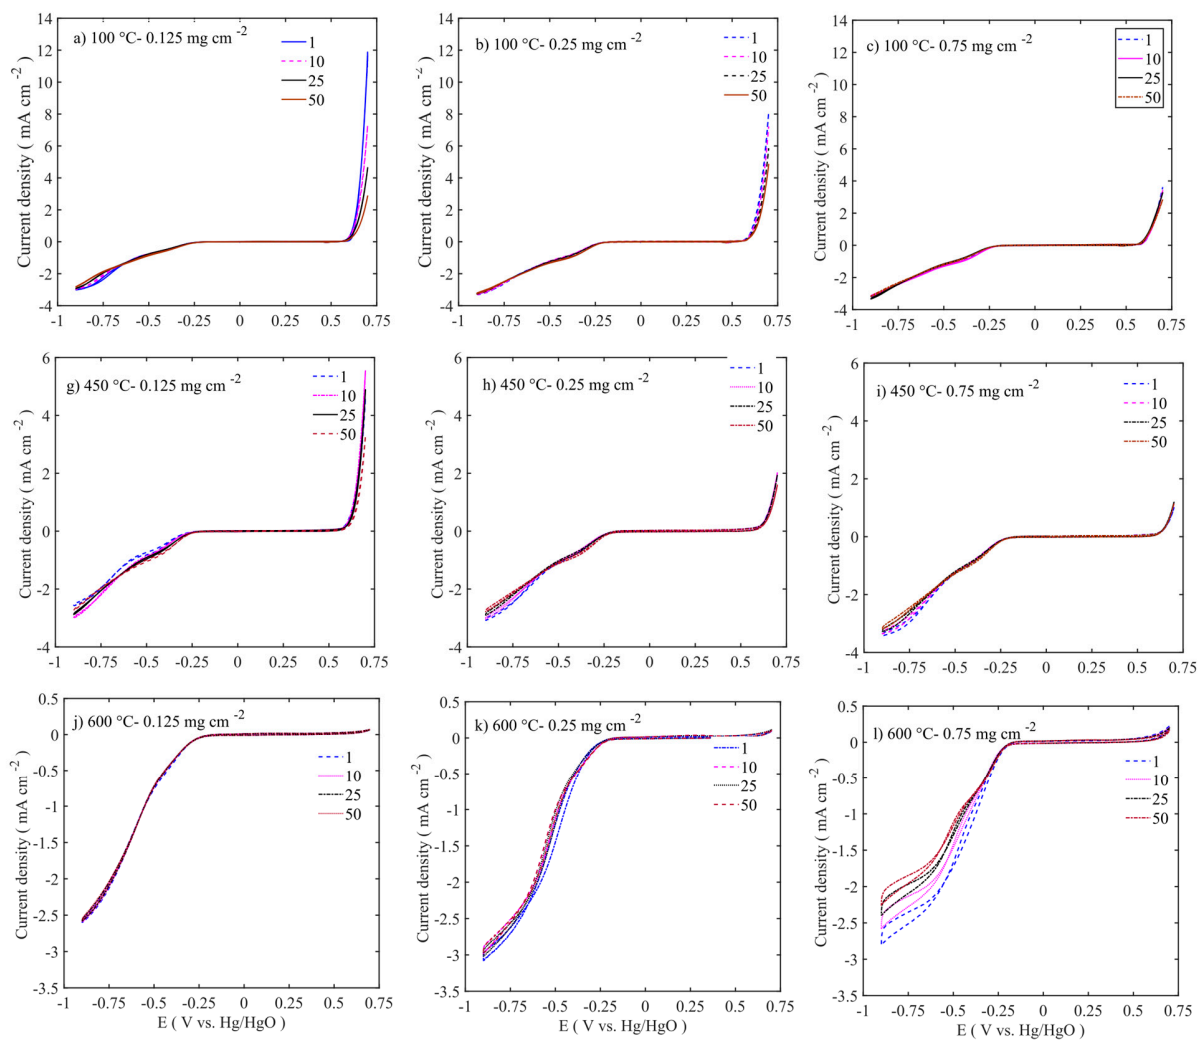

51 Figure S4. Raman spectra of the different samples a) 100-250 °C; b) 450-600 °C

52

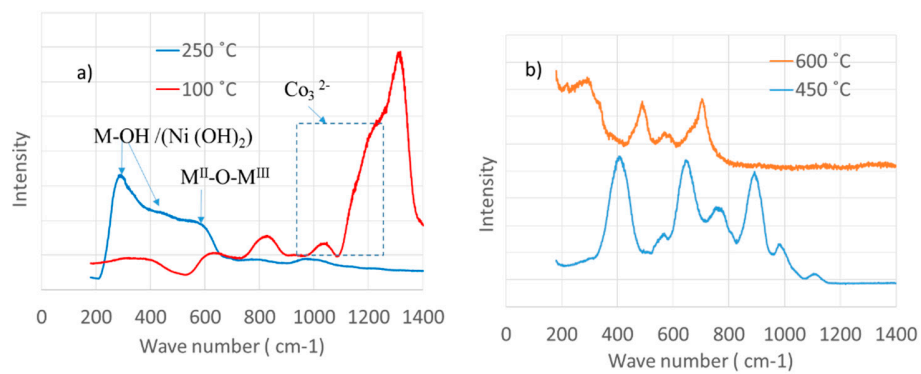

53
